# Supplementary material for: Hydroflux-assisted cold sintering: eutectic mixtures for boosting ionic conductivity in LATP solid-state electrolytes
Source: Royal Society of Chemistry journal article supplement (doi:10.1039/d4ma00582a), 2024-01-01
Supplement: d4ma00582a1.pdf [file d4ma00582a1.pdf]

# **Hydroflux-Assisted Cold Sintering: Eutectic Mixtures for Boosting Ionic Conductivity in LATP Solid-State Electrolytes**

Andrés Mormeneo-Segarra<sup>a,b</sup>, Sergio Ferrer-Nicomedes<sup>a,b</sup>, Nuria Vicente-Agut<sup>a,b</sup> (\*),  
Antonio Barba-Juan<sup>a,b</sup>

*<sup>a</sup>Department of Chemical Engineering, Universitat Jaume I, 12071, Castellón, Spain*

*<sup>b</sup>Institute of Ceramic Technology, Universitat Jaume I, 12071, Castellón, Spain*

(\*). Corresponding author. E-mail: [vicenten@uji.es](mailto:vicenten@uji.es)

**Supporting Information**

## Density measurement

The theoretical density of the hydroflux is calculated by the mixing rule, that is:

$$\rho_{Eutectic} = \frac{1}{\frac{\omega_{LiNO_3}}{\rho_{LiNO_3}} + \frac{\omega_{LiOH}}{\rho_{LiOH}}}$$

where  $\omega_{LiNO_3}$  and  $\omega_{LiOH}$  stand for the mass fractions of lithium nitrate and lithium hydroxide respectively. The  $\rho_{LiNO_3}$  and  $\rho_{LiOH}$  are the densities of lithium nitrate and lithium hydroxide, being 2.38 and 1.46 g/cm<sup>3</sup> respectively. To calculate the real density of the mixture LATP-Hydroflux the same procedure has been used but, in this case the theoretical density used for the LATP is 2.91 g/cm<sup>3</sup> measured by helium pycnometry.

$$\rho_{Theoretical} = \frac{1}{\frac{\omega_{Hydroflux}}{\rho_{Hydroflux}} + \frac{\omega_{LATP}}{\rho_{LATP}}}$$

To compare the different samples produced is a common methodology to use the relative density,  $\phi$ , that is the quotient of the theoretical and the real density of the sample. As theoretical density of the sample authors used the previous equation. It must be considered that this density depends on the quantities used in the preparation.

$$\phi = \frac{\rho_{Sample}}{\rho_{Theoretical}}$$

The sample's real density is calculated by means of the Arquimedes' method with mercury immersion.

$$\rho_{Sample} = \left( \frac{m_{dry}}{m_{Hg}} \right) \cdot \rho_{Hg}$$

In this equation  $m_{dry}$  is the sample's mass after drying overnight,  $m_{Hg}$  the mass immersed in mercury and  $\rho_{Hg}$  the density of mercury (13.53 g/cm<sup>3</sup>). When calculating the relative density, the obtention of porosity is a direct calculation because:

$$\phi + \varepsilon = 1$$

where  $\varepsilon$  is the sample's porosity. The previous equation considers that the sum of solid and pore volume equals one as expected. Results are shown in **Table S1**.

**Table S1.** Densities of the samples prepared.

| Sample                 | $\omega_{Hydroflux}$ | $\rho_{LATP+Hydroflux}$ (g/cm <sup>3</sup> ) | $\rho_{Sample}$ (g/cm <sup>3</sup> ) | $\phi$ (%) |
|------------------------|----------------------|----------------------------------------------|--------------------------------------|------------|
| 20@solids              | 0.20                 | 2.71                                         | 2.18                                 | 80.5       |
| 20@no-H <sub>2</sub> O | 0.20                 | 2.71                                         | 2.16                                 | 79.5       |
| 20@H <sub>2</sub> O    | 0.20                 | 2.71                                         | 2.29                                 | 84.3       |
| 15@H <sub>2</sub> O    | 0.15                 | 2.76                                         | 2.31                                 | 83.6       |

**Table S2.** Fitting results of the 20@solids sample.

| T (°C) | 1000/T (K <sup>-1</sup> ) | R <sub>tot</sub> (Ω) | σ <sub>tot</sub> (S cm <sup>-1</sup> ) | ln (σ <sub>tot</sub> ·T) |
|--------|---------------------------|----------------------|----------------------------------------|--------------------------|
| 87     | 2.78                      | 390.4                | 3.68·10 <sup>-4</sup>                  | -2.020                   |
| 75     | 2.87                      | 723.1                | 1.99·10 <sup>-4</sup>                  | -2.670                   |
| 66     | 2.95                      | 1193.0               | 1.21·10 <sup>-4</sup>                  | -3.197                   |
| 58     | 3.02                      | 1737.0               | 8.28·10 <sup>-5</sup>                  | -3.597                   |
| 51     | 3.08                      | 2425.0               | 5.93·10 <sup>-5</sup>                  | -3.952                   |
| 47     | 3.12                      | 3277.0               | 4.39·10 <sup>-5</sup>                  | -4.265                   |
| 44     | 3.15                      | 4130.0               | 3.48·10 <sup>-5</sup>                  | -4.506                   |
| 41     | 3.18                      | 4990.3               | 2.88·10 <sup>-5</sup>                  | -4.705                   |
| 39     | 3.20                      | 5819.0               | 2.47·10 <sup>-5</sup>                  | -4.865                   |
| 37     | 3.22                      | 6666.0               | 2.16·10 <sup>-5</sup>                  | -5.007                   |
| 36     | 3.23                      | 7509.7               | 1.91·10 <sup>-5</sup>                  | -5.130                   |
| 34     | 3.26                      | 8313.0               | 1.73·10 <sup>-5</sup>                  | -5.238                   |
| 33     | 3.27                      | 9764.0               | 1.47·10 <sup>-5</sup>                  | -5.402                   |
| 32     | 3.28                      | 10755.0              | 1.34·10 <sup>-5</sup>                  | -5.502                   |
| 31     | 3.29                      | 11609.0              | 1.24·10 <sup>-5</sup>                  | -5.582                   |
| 30     | 3.30                      | 12277.0              | 1.17·10 <sup>-5</sup>                  | -5.641                   |
| 30     | 3.30                      | 14885.0              | 9.66·10 <sup>-6</sup>                  | -5.833                   |

**Table S3.** Fitting results of the 20@no-H<sub>2</sub>O sample.

| T (°C) | 1000/T (K <sup>-1</sup> ) | R <sub>tot</sub> (Ω) | σ <sub>tot</sub> (S cm <sup>-1</sup> ) | ln (σ <sub>tot</sub> ·T) |
|--------|---------------------------|----------------------|----------------------------------------|--------------------------|
| 85     | 2.79                      | 322.1                | 4.95·10 <sup>-4</sup>                  | -1.730                   |
| 64     | 2.97                      | 586.1                | 2.72·10 <sup>-4</sup>                  | -2.389                   |
| 57     | 3.03                      | 767.0                | 2.08·10 <sup>-4</sup>                  | -2.679                   |
| 51     | 3.08                      | 939.4                | 1.70·10 <sup>-4</sup>                  | -2.900                   |
| 47     | 3.12                      | 1121.2               | 1.42·10 <sup>-4</sup>                  | -3.089                   |
| 44     | 3.15                      | 1263.4               | 1.26·10 <sup>-4</sup>                  | -3.218                   |
| 40     | 3.19                      | 1413.0               | 1.13·10 <sup>-4</sup>                  | -3.343                   |
| 38     | 3.21                      | 1546.5               | 1.03·10 <sup>-4</sup>                  | -3.439                   |
| 37     | 3.22                      | 1664.9               | 9.58·10 <sup>-5</sup>                  | -3.516                   |
| 35     | 3.25                      | 1769.0               | 9.01·10 <sup>-5</sup>                  | -3.584                   |
| 34     | 3.26                      | 1853.5               | 8.60·10 <sup>-5</sup>                  | -3.633                   |
| 33     | 3.27                      | 1935.5               | 8.24·10 <sup>-5</sup>                  | -3.680                   |
| 32     | 3.28                      | 2020.3               | 7.89·10 <sup>-5</sup>                  | -3.726                   |
| 31     | 3.29                      | 2093.8               | 7.62·10 <sup>-5</sup>                  | -3.765                   |
| 30     | 3.30                      | 2214.5               | 7.20·10 <sup>-5</sup>                  | -3.825                   |
| 30     | 3.30                      | 2267.0               | 7.03·10 <sup>-5</sup>                  | -3.848                   |

**Table S4.** Fitting results of the 20@H<sub>2</sub>O sample.

| <b>T (°C)</b> | <b>1000/T (K<sup>-1</sup>)</b> | <b>R<sub>tot</sub> (Ω)</b> | <b>σ<sub>tot</sub> (S cm<sup>-1</sup>)</b> | <b>ln (σ<sub>tot</sub>·T)</b> |
|---------------|--------------------------------|----------------------------|--------------------------------------------|-------------------------------|
| 80            | 2.83                           | 129.4                      | 1.02·10 <sup>-3</sup>                      | -1.021                        |
| 75            | 2.87                           | 157.2                      | 8.40·10 <sup>-4</sup>                      | -1.230                        |
| 70            | 2.91                           | 185.8                      | 7.10·10 <sup>-4</sup>                      | -1.411                        |
| 66            | 2.95                           | 216.1                      | 6.11·10 <sup>-4</sup>                      | -1.574                        |
| 62            | 2.98                           | 250.0                      | 5.28·10 <sup>-4</sup>                      | -1.732                        |
| 57            | 3.03                           | 284.4                      | 4.64·10 <sup>-4</sup>                      | -1.876                        |
| 54            | 3.06                           | 320.4                      | 4.12·10 <sup>-4</sup>                      | -2.004                        |
| 50            | 3.09                           | 361.3                      | 3.65·10 <sup>-4</sup>                      | -2.136                        |
| 46            | 3.13                           | 399.3                      | 3.31·10 <sup>-4</sup>                      | -2.249                        |
| 44            | 3.15                           | 477.9                      | 2.76·10 <sup>-4</sup>                      | -2.435                        |
| 38            | 3.21                           | 590.6                      | 2.24·10 <sup>-4</sup>                      | -2.666                        |
| 36            | 3.23                           | 659.8                      | 2.00·10 <sup>-4</sup>                      | -2.783                        |
| 32            | 3.28                           | 746.0                      | 1.77·10 <sup>-4</sup>                      | -2.919                        |
| 30            | 3.30                           | 861.7                      | 1.53·10 <sup>-4</sup>                      | -3.070                        |
| <i>30</i>     | <i>3.30</i>                    | <i>874.7</i>               | <i>1.51·10<sup>-4</sup></i>                | <i>-3.085</i>                 |

**Table S5.** Fitting results of the 15@H<sub>2</sub>O sample.

| <b>T (°C)</b> | <b>1000/T (K<sup>-1</sup>)</b> | <b>R<sub>tot</sub> (Ω)</b> | <b>σ<sub>tot</sub> (S cm<sup>-1</sup>)</b> | <b>ln (σ<sub>tot</sub>·T)</b> |
|---------------|--------------------------------|----------------------------|--------------------------------------------|-------------------------------|
| 68            | 2.93                           | 812.2                      | 1.93·10 <sup>-4</sup>                      | -2.720                        |
| 57            | 3.03                           | 1185.0                     | 1.32·10 <sup>-4</sup>                      | -3.130                        |
| 50            | 3.09                           | 1647.4                     | 9.52·10 <sup>-5</sup>                      | -3.481                        |
| 45            | 3.14                           | 2122.0                     | 7.39·10 <sup>-5</sup>                      | -3.750                        |
| 42            | 3.17                           | 2474.4                     | 6.34·10 <sup>-5</sup>                      | -3.913                        |
| 38            | 3.21                           | 2908.3                     | 5.39·10 <sup>-5</sup>                      | -4.088                        |
| 36            | 3.23                           | 3319.1                     | 4.73·10 <sup>-5</sup>                      | -4.226                        |
| 34            | 3.26                           | 3702.7                     | 4.24·10 <sup>-5</sup>                      | -4.342                        |
| 32            | 3.28                           | 4019.3                     | 3.90·10 <sup>-5</sup>                      | -4.431                        |
| 31            | 3.29                           | 4328.0                     | 3.62·10 <sup>-5</sup>                      | -4.508                        |
| <i>30</i>     | <i>3.30</i>                    | <i>4663.8</i>              | <i>3.36·10<sup>-5</sup></i>                | <i>-4.586</i>                 |

**Table S6.** Literature review of the LATP obtained via CSP.

| Composition                                                                                            | P (MPa)   | T (°C)    | t           | d <sub>50</sub> (μm) | TLP                                           | Post-annealing                                                               | φ (%)    | σ (S cm <sup>-1</sup> )     | E <sub>a</sub> (eV) | Ref. |
|--------------------------------------------------------------------------------------------------------|-----------|-----------|-------------|----------------------|-----------------------------------------------|------------------------------------------------------------------------------|----------|-----------------------------|---------------------|------|
| Li <sub>1.3</sub> Al <sub>0.3</sub> Ti <sub>1.7</sub> (PO <sub>4</sub> ) <sub>3</sub>                  | 420       | 120       | 1h          | 0.3-0.4              | NMP (30 vol.%)                                | 650 °C - 2h                                                                  | 74±2     | 2.07·10 <sup>-5</sup>       | 0.41±0.02           | 1    |
|                                                                                                        |           |           |             |                      | H <sub>2</sub> O + NMP (30 vol.%)             |                                                                              | 79±2     | 2.79·10 <sup>-5</sup>       | 0.40±0.02           |      |
|                                                                                                        |           |           |             |                      | Hac - 1M + NMP (30 vol.%)                     |                                                                              | 93±2     | 8.04·10 <sup>-5</sup>       | 0.37±0.02           |      |
|                                                                                                        |           |           |             |                      | Hac - 1M + DMSO (30 vol.%)                    |                                                                              | 84±2     | 3.03·10 <sup>-5</sup>       | 0.39±0.02           |      |
| Li <sub>1+x+y</sub> Al <sub>x</sub> Ti <sub>2-x</sub> Si <sub>y</sub> P <sub>3-y</sub> O <sub>12</sub> | 620       | 130       | 2h          | 1.15                 | H <sub>2</sub> O (20 wt.%) + LiTFSi (0 wt.%)  | No                                                                           | 90.6±0.7 | (2.7±0.89)·10 <sup>-5</sup> | 0.26                | 2    |
|                                                                                                        |           |           |             |                      | H <sub>2</sub> O (20 wt.%) + LiTFSi (4 wt.%)  |                                                                              | 90.7±2.3 | (5.9±2.1)·10 <sup>-5</sup>  | -                   |      |
|                                                                                                        |           |           |             |                      | H <sub>2</sub> O (20 wt.%) + LiTFSi (11 wt.%) |                                                                              | 91.1±0.8 | (7.8±1.0)·10 <sup>-5</sup>  | -                   |      |
|                                                                                                        |           |           |             |                      | H <sub>2</sub> O (20 wt.%) + LiTFSi (17 wt.%) |                                                                              | 91.1±2.7 | (18±4.7)·10 <sup>-5</sup>   | 0.26                |      |
|                                                                                                        |           |           |             |                      | H <sub>2</sub> O (20 wt.%) + LiTFSi (22 wt.%) |                                                                              | 93.4±0.2 | (14±1.9)·10 <sup>-5</sup>   | -                   |      |
| Li <sub>1.3</sub> Al <sub>0.3</sub> Ti <sub>1.7</sub> (PO <sub>4</sub> ) <sub>3</sub>                  | 25        | 200       | 5 min       | 1-5                  | H <sub>2</sub> O (30 wt.%)                    | Green samples are heated up to 650 °C for 2 h and after the CSP was launched | -        | 14·10 <sup>-5</sup>         | -                   | 3    |
|                                                                                                        |           |           | 10 min      |                      | H <sub>2</sub> O (30 wt.%)                    |                                                                              | -        | 18·10 <sup>-5</sup>         | -                   |      |
|                                                                                                        |           |           | 30 min      |                      | H <sub>2</sub> O (30 wt.%)                    |                                                                              | -        | 30·10 <sup>-5</sup>         | -                   |      |
| Li <sub>1.3</sub> Al <sub>0.3</sub> Ti <sub>1.7</sub> (PO <sub>4</sub> ) <sub>3</sub>                  | 600       | 140       | 1h          | 0.8                  | LiAc·2H <sub>2</sub> O (3.2 wt.% dry)         | No                                                                           | 75±1.5   | 0.02·10 <sup>-5</sup>       | -                   | 4    |
|                                                                                                        | 600 → 510 | 140 → 200 | 30 min → 1h |                      | LiAc·2H <sub>2</sub> O (3.2 wt.% dry)         |                                                                              | 87±1.5   | 0.10·10 <sup>-5</sup>       | -                   |      |
|                                                                                                        | 600       | 140       | 1h          |                      | HAc - 1.66M (20 wt.%)                         |                                                                              | 88±1.5   | 0.25·10 <sup>-5</sup>       | -                   |      |
|                                                                                                        | 600 → 510 | 140 → 200 | 30 min → 1h |                      | HAc - 1.66M (20 wt.%)                         |                                                                              | 94±1.5   | 0.82·10 <sup>-5</sup>       | -                   |      |
|                                                                                                        | 600 → 510 | 140 → 200 | 30 min → 1h |                      | H <sub>2</sub> O (20 wt.%)                    |                                                                              | 94±1.5   | 1.26·10 <sup>-5</sup>       | -                   |      |
|                                                                                                        | 600 → 510 | 140 → 200 | 30 min → 1h |                      | LiOH·H <sub>2</sub> O - 0.1M (20 wt.%)        |                                                                              | 90±1.5   | -                           | -                   |      |
| Li <sub>1.3</sub> Al <sub>0.3</sub> Ti <sub>1.7</sub> (PO <sub>4</sub> ) <sub>3</sub>                  | 250       | 150       | 1h          | 0.03-0.18            | H <sub>2</sub> O (30 wt.%)                    | No                                                                           | 75.2     | -                           | -                   | 5    |
|                                                                                                        |           | 200       |             |                      |                                               |                                                                              | -        | -                           | -                   |      |
|                                                                                                        |           | 250       |             |                      |                                               |                                                                              | 83.0     | 0.20·10 <sup>-5</sup>       | -                   |      |
|                                                                                                        |           | 250       |             |                      |                                               |                                                                              | 79.3     | 0.39·10 <sup>-5</sup>       | -                   |      |
|                                                                                                        |           |           |             | 0.04-0.20            |                                               | 800 °C - 1h                                                                  | 87.7     | 2.86·10 <sup>-5</sup>       | -                   |      |

|                                                                                                                      |     |     |      |           |  |                                                            |      |                      |                      |       |
|----------------------------------------------------------------------------------------------------------------------|-----|-----|------|-----------|--|------------------------------------------------------------|------|----------------------|----------------------|-------|
|                                                                                                                      |     |     |      | 0.05-0.38 |  | 900 °C - 1h                                                | 87.4 | $42.9 \cdot 10^{-5}$ | -                    |       |
|                                                                                                                      |     |     |      | 0.4-1.7   |  | 1000 °C - 1h                                               | 96.0 | $14.6 \cdot 10^{-5}$ | -                    |       |
|                                                                                                                      |     |     |      | 0.8-2     |  | 1100 °C - 1h                                               | 96.3 | $2.23 \cdot 10^{-5}$ | -                    |       |
| Li <sub>1.3</sub> Al <sub>0.3</sub> Ti <sub>1.7</sub> (PO <sub>4</sub> ) <sub>3</sub>                                | 700 | 150 | 1.5h | 0.190     |  | HAc - 3M + 2 wt.% Bi <sub>2</sub> O <sub>3</sub> (5 wt.%)  |      |                      | $0.03 \cdot 10^{-5}$ | 0.565 |
|                                                                                                                      |     |     |      |           |  | HAc - 3M + 2 wt.% Bi <sub>2</sub> O <sub>3</sub> (10 wt.%) |      |                      | $0.92 \cdot 10^{-5}$ | 0.368 |
|                                                                                                                      |     |     |      |           |  | HAc - 3M + 2 wt.% Bi <sub>2</sub> O <sub>3</sub> (15 wt.%) | No   | 95                   | $3.02 \cdot 10^{-5}$ | 0.367 |
|                                                                                                                      |     |     |      |           |  | HAc - 3M + 2 wt.% Bi <sub>2</sub> O <sub>3</sub> (20 wt.%) |      |                      | $3.49 \cdot 10^{-5}$ | 0.365 |
|                                                                                                                      |     |     |      |           |  | HAc - 3M + 2 wt.% Bi <sub>2</sub> O <sub>3</sub> (25 wt.%) |      |                      | $4.00 \cdot 10^{-5}$ | 0.355 |
| 0.9(Li <sub>1.3</sub> Al <sub>0.3</sub> Ti <sub>1.7</sub> (PO <sub>4</sub> ) <sub>3</sub> )<br>+<br>0.1(2PEO:LiTFSi) | 700 | 150 | 1.5h | 0.190     |  | HAc - 3M (5 wt.%)                                          |      |                      | $5.77 \cdot 10^{-5}$ | 0.307 |
|                                                                                                                      |     |     |      |           |  | HAc - 3M (10 wt.%)                                         | No   | >98                  | $6.94 \cdot 10^{-5}$ | 0.308 |
|                                                                                                                      |     |     |      |           |  | HAc - 3M (12.5 wt.%)                                       |      |                      | $9.50 \cdot 10^{-5}$ | 0.306 |
|                                                                                                                      |     |     |      |           |  | HAc - 3M (15 wt.%)                                         |      |                      | $13.2 \cdot 10^{-5}$ | 0.298 |
| Li <sub>1.3</sub> Al <sub>0.3</sub> Ti <sub>1.7</sub> (PO <sub>4</sub> ) <sub>3</sub>                                | 700 | 150 | 1.5h | 0.190     |  | HAc - 3M (25 wt.%)                                         |      |                      | $3.70 \cdot 10^{-5}$ | 0.36  |
|                                                                                                                      |     |     |      |           |  | HAc - 3M + 1 wt.% Bi <sub>2</sub> O <sub>3</sub> (25 wt.%) |      |                      | $4.47 \cdot 10^{-5}$ | 0.37  |
|                                                                                                                      |     |     |      |           |  | HAc - 3M + 2 wt.% Bi <sub>2</sub> O <sub>3</sub> (25 wt.%) | No   | 82*                  | $4.48 \cdot 10^{-5}$ | 0.35  |
|                                                                                                                      |     |     |      |           |  | HAc - 3M + 3 wt.% Bi <sub>2</sub> O <sub>3</sub> (25 wt.%) |      |                      | $4.45 \cdot 10^{-5}$ | 0.35  |
|                                                                                                                      |     |     |      |           |  | HAc - 3M + 4 wt.% Bi <sub>2</sub> O <sub>3</sub> (25 wt.%) |      |                      | $3.97 \cdot 10^{-5}$ | 0.35  |
|                                                                                                                      |     |     |      |           |  | HAc - 3M + 5 wt.% Bi <sub>2</sub> O <sub>3</sub> (25 wt.%) |      |                      | $3.73 \cdot 10^{-5}$ | 0.35  |
| Li <sub>1.3</sub> Al <sub>0.3</sub> Ti <sub>1.7</sub> (PO <sub>4</sub> ) <sub>3</sub>                                | 700 | 150 | 1.5h | 1.208     |  | HAc - 3M (15 wt.%)                                         |      | 78.7*                | $0.37 \cdot 10^{-5}$ | 0.560 |
|                                                                                                                      |     |     |      | 0.875     |  | HAc - 3M (15 wt.%)                                         |      | 80.2*                | $11.7 \cdot 10^{-5}$ | 0.343 |
|                                                                                                                      |     |     |      | 0.645     |  | HAc - 3M (15 wt.%)                                         |      | 81.1*                | $8.41 \cdot 10^{-5}$ | 0.372 |
|                                                                                                                      |     |     |      | 0.415     |  | HAc - 3M (15 wt.%)                                         |      | 81.8*                | $5.55 \cdot 10^{-5}$ | 0.384 |
|                                                                                                                      |     |     |      | 0.190     |  | HAc - 3M (15 wt.%)                                         | No   | 81.9*                | $3.09 \cdot 10^{-5}$ | 0.389 |
|                                                                                                                      |     |     |      | 1.208     |  | HAc - 3M (17.5 wt.%)                                       |      | 78.7*                | $3.86 \cdot 10^{-5}$ | 0.383 |
|                                                                                                                      |     |     |      | 1.208     |  | HAc - 3M (20 wt.%)                                         |      | 78.5*                | $16.9 \cdot 10^{-5}$ | 0.317 |
|                                                                                                                      |     |     |      | 0.875     |  | HAc - 3M (20 wt.%)                                         |      | 79.8*                | $12.5 \cdot 10^{-5}$ | 0.356 |

|       |                    |       |                      |       |
|-------|--------------------|-------|----------------------|-------|
| 0.645 | HAc - 3M (20 wt.%) | 80.8* | $8.21 \cdot 10^{-5}$ | 0.384 |
| 0.415 | HAc - 3M (20 wt.%) | 81.2* | $6.90 \cdot 10^{-5}$ | 0.363 |
| 0.376 | HAc - 3M (20 wt.%) | 81.2* | $6.40 \cdot 10^{-5}$ | 0.368 |
| 0.268 | HAc - 3M (20 wt.%) | 81.4* | $5.17 \cdot 10^{-5}$ | 0.380 |
| 0.190 | HAc - 3M (20 wt.%) | 81.5* | $3.15 \cdot 10^{-5}$ | 0.386 |

\*Measured by mercury immersion, considering open and closed porosity

## References

- 1 Y. Liu, J. Liu, Q. Sun, D. Wang, K. R. Adair, J. Liang, C. Zhang, L. Zhang, S. Lu, H. Huang, X. Song and X. Sun, *ACS Appl Mater Interfaces*, 2019, **11**, 27890–27896.
- 2 W. Lee, C. K. Lyon, J. H. Seo, R. Lopez-Hallman, Y. Leng, C. Y. Wang, M. A. Hickner, C. A. Randall and E. D. Gomez, *Adv Funct Mater*, , DOI:10.1002/ADFM.201807872.
- 3 N. Hamao, Y. Yamaguchi and K. Hamamoto, *Materials*, 2021, **14**, 4737.
- 4 M. Vinnichenko, K. Waetzig, A. Aurich, C. Baumgaertner, M. Herrmann, C. W. Ho, M. Kusnezoff and C. W. Lee, *Nanomaterials (Basel)*, 2022, **12**, 3178.
- 5 H. Cai, T. Yu, D. Xie, B. Sun, J. Cheng, L. Li, X. Bao and H. Zhang, *J Alloys Compd*, 2023, **939**, 168702.
- 6 A. Mormeneo-Segarra, S. Ferrer-Nicomedes, N. Vicente-Agut and A. Barba-Juan, *Ceram Int*, 2023, **49**, 36497–36506.
- 7 S. Ferrer-Nicomedes, A. Mormeneo-Segarra, N. Vicente-Agut and A. Barba-Juan, *J Power Sources*, 2023, **581**, 233494.
- 8 A. Mormeneo-Segarra, S. Ferrer-Nicomedes, S. Simon, N. Vicente-Agut, J. C. Jarque-Fonfría and A. Barba-Juan, *Solid State Ion*, 2024, **406**, 116482.
- 9 A. Mormeneo-Segarra, S. Ferrer-Nicomedes, N. Vicente-Agut and A. Barba-Juan, *J Eur Ceram Soc*, 2024, **44**, 5105–5114.
